# Supplementary material
Source: publisher figshare collection journal article supplement (https://gsajournals.figshare.com/ndownloader/files/25267334)
Supplement: Supplementary file 1 [file 25267334]

Primer	Sequence	Description
ADG085	CGCCGCTGAGAAAAAGCAA	rrsA forward amplification primer
ADG086	AGCCCCATAACATGTAGTTAAAACC	rrsA reverse amplification primer
ADG087	AGTTTTAGGCTGATTTGGTTGAATGT	rrsB forward amplification primer
ADG088	TGATTTCTTTTCCTCGGGGTACTTA	rrsB reverse amplification primer
ADG089	TTATGGCACATTAACGGGGCTTTTGC	rrsC forward amplification primer
ADG090	TCGCTTAACCTCACAACCCGAAGAT	rrsC reverse amplification primer
ADG092	CACAGGATGGTCGGAACAACGAAGA	rrsD forward amplification primer
ADG091	TACAGAGATGGTGGAGCTATGCGGG	rrsD reverse amplification primer
ADG093	GTAATATACGCCACCTCGCGACAG	rrsE forward amplification primer
ADG094	GCGACTTTCACTCACAAACCAGCA	rrsE reverse amplification primer
ADG096	TGTTTTGCCTGAAAAATGAGCGAACG	rrsG forward amplification primer
ADG095	ATCCACCGTGTACGCTTAGTCGCTT	rrsG reverse amplification primer
ADG097	ACAGCCGGTTCGGTTGAAGAGAAAA	rrsH forward amplification primer
ADG098	CTACAGAGATGGTGGAGCTATGCGG	rrsH reverse amplification primer
ADG099	CGCGTGTATGAAGAAGGCCT	rrs internal sequencing primer 1
ADG100	AGGTTGAGCCCGGGGATTTCACATC	rrs internal sequencing primer 2
ADG101	TAGTCCACGCCGTAAACGATGTCGA	rrs internal sequencing primer 3
ADG103	TGTACCTGCAAAGGTTCACTGCGA	rrlA-rrfA forward amplification primer
ADG104	TGGTGGAGTGGATGCAAAAGCAGA	rrlA-rrfA reverse amplification primer
ADG105	ATACGTCCCCTTCGTCTAGAGGCC	rrlB-rrfB forward amplification primer
ADG106	AGGAGTGGTTCATAGCTGCTTTCCT	rrlB-rrfB reverse amplification primer
ADG107	TGGTTTGTGAGTGAAAGTCGCCGA	rrlC-rrfC forward amplification primer
ADG108	CCTAATTAGGGTGGCGGAACGGAC	rrlC-rrfC reverse amplification primer
ADG109	TGTACCTGCAAAGGTTCACTGCGA	rrlD-rrfD forward amplification primer
ADG110	GTGGGACCACCGCGCTACTG	rrlD-rrfD reverse amplification primer
ADG111	TGGTTTGTGAGTGAAAGTCGCCGA	rrlE-rrfE forward amplification primer
ADG112	CTTCGCAACGTTCAAATCCGCTCC	rrlE-rrfE reverse amplification primer
ADG113	TGGTTTGTGAGTGAAAGTCGCCGA	rrlG-rrfG forward amplification primer
ADG114	CCGTATCCGTTGCTGAATCTGGCA	rrlG-rrfG reverse amplification primer
ADG115	ATCCCGCATAGCTCCACCATCTCT	rrlH-rrfH forward amplification primer
ADG116	GAACGGACGGGACTCGAACCC	rrlH-rrfH reverse amplification primer
ADG117	ACGCCCAGTTAAGACTCGGT	rrl-rrf internal sequencing primer 1
ADG118	GCGTTCTGTAAGCCTGTGAA	rrl-rrf internal sequencing primer 2
ADG119	CGAAGATACCAGCTGGCTGC	rrl-rrf internal sequencing primer 3
ADG120	TGGCACCTCGATGTCGGCTC	rrl-rrf internal sequencing primer 4
# Notes
# The sets {ADG107, ADG111, ADG113} and {ADG103, ADG109} have the same sequences due to degeneracy
# in the rrs-rrl spacer. Because they are paired with unique primers for PCR, they amplfy a specific rRNA copy
